# Supplementary material for: Forensic age estimation using computed tomography of the medial clavicular epiphysis: a systematic review
Source: Springer Nature journal article supplement (doi:10.1007/s00414-018-1847-z), 2018-04-30
Supplement: MOESM1 [file 15728820]

## Sheet: supplementary material
Table S1 Assessment of methodological quality
Authors	Year	Population different from previous studies	Adequacy number of included individuals - total number of evaluated CT scans	Comparability and quality of imaging technique				Quality of evaluation process of CT-scans				Risk of biases	Article selected
				Slice thickness (mm)	CT incidence	CT-scan model	Viewing software	Evaluation by >= 2 readers	Control of intra- and inter-observer variability	Intra- and inter-observer test value	Exclusion of individuals with identified potential bias
Schulz et al. [16]	2005	Yes	NP	2017-07-01	coronal images	4-row MDCT system (Siemens Sensation)	NP	NP	NP		Yes	Medium	Yes
Kellinghaus et al. [37]	2010 (1)	Yes	NP	0.6-1.5	axial and MPR images	16-row and 40-row MDCT systems (Somatom Sensation, Siemens Medical Solutions)	Syngo Somaris 5-VB20B (Siemens)	NP	NP		Yes	Medium	Yes
Kellinghaus et al. [17]	2010 (2)	No*	NP	0.6-1.5	axial and MPR images	16-row and 40-row MDCT systems (Somatom Sensation, Siemens Medical Solutions)	Syngo Somaris 5-VB20B (Siemens)	NP	NP		Yes	Medium	Yes
Zhao et al. [51]	2011	Yes	NP	1	NP	16-row MDCT system (Siemens Sensation)	SyngoFastView (Siemens)	Yes	NP		NP	Medium	Yes
El Gerby et al. [52]	2013	Yes	No	1-1.25	axial and MPR images	16-row MDCT system (Actvion, Toshiba)	(Toshiba software)	NP	NP		No	High	No
Wang et al. [53]	2013	NP	NP	0.6-2	axial, coronal and MPR images	40-slide CT system (Somatom Definition AS)	SyngoFastView (Siemens)	NP	NP		NP	Medium	Yes
Pattamapaspong et al. [54]	2015	Yes	Yes	0.6-1	axial, coronal and MPR images	Dual source-CT system (Somatom Definition, Siemens) and 16-row MDCT system (Aquilion, Toshiba)	Synapse version 4.1 (Fujifilm Medical System)	Yes	NP		Yes	Low	Yes
Ekizoglu et al. [55]	2015 (1)	Yes	Yes	1	axial images	40-row MDCT system (Siemens Medical Solutions)	Leonardo Workstation (Siemens)	Yes	Yes (Cohen’s κ statistical test)	0.768 and 0.826	Yes	Low	Yes
Franklin et al. [38]	2015	Yes	Yes	0.625-2	axial and MPR images	64-row MDCT system (Philips Brilliance 64 scanner, Philips Healthcare)	OsiriX version 3.9 (64 bit)	Yes	Yes (Cohen’s κ statistical test)	0.915-0.945 and 0.889	Yes	Low	Yes
Zhang et al. [56]	2015	NP	NP	1	axial and MPR images	16-row MDCT system (Somatom Sensation, Siemens Medical Solutions)	Syngo Somaris 5-VB20B (Siemens)	No	No		Yes	High	No
Ekizoglu et al. [57]	2015 (2)	Yes	Yes	1	axial images	40-row MDCT system (Siemens Medical Solutions)	Leonardo Workstation (Siemens)	Yes	Yes (Cohen’s κ statistical test)	0.916 and 0.868	Yes	Low	Yes
Houpert et al. [58]	2016	Yes	Yes	1	axial and coronal images	128-row MDCT system (Siemens Somatom AS, Siemens)	Horizon Rad Station (McKesson Medical Imaging Group)	Yes	Yes (Cohen’s κ statistical test)	0.82 and 0.96	Yes	Low	Yes
Gurses et al. [59]	2016	Yes	Yes	0.6-1	axial and MPR images	128-row MDCT system (Somatom Definition AS, Siemens Medical Solutions)	BARCO software (General Electric)	Yes	Yes (Cohen’s κ statistical test)	0.887-0.857 and 0.871	Yes	Low	Yes
Gurses et al. [60]	2017	Yes	Yes	0.6-1	axial and MPR images	128-row MDCT system (Somatom Definition AS, Siemens Medical Solutions)	BARCO software (General Electric)	Yes	Yes (Cohen’s κ statistical test)	0.909-0.900 and 0.890	Yes	Low	Yes
Ramadan et al. [61]	2017	Yes	Yes	0.6	axial and MPR images	16-row MDCT system (Somatom Emotion AS, Siemens Medical Solutions)	Syngo.via (Siemens)	Yes	Yes (Cohen’s κ statistical test)	0.901 and 0.884	Yes	Low	Yes
* Kellinghaus 2010 (1)
NP: Not precised; MDCT: Multiple detector computed tomography; MPR: Multiplanar reconstruction
